# Supplementary material for: Schlafen4+-MDSC in Helicobacter-induced gastric metaplasia reveals role for GTPases
Source: PubMed Central journal article supplement (PMC10272601; doi:10.3389/fimmu.2023.1139391), 2023-06-02
Supplement: Table_1.pdf [file Table_1.pdf]

**Table S1. List of canonical markers used to assign the cell clusters.**

| <b>Class</b>                     | <b>Figures</b> | <b>Cell types</b>   | <b>Genes</b>                                    |
|----------------------------------|----------------|---------------------|-------------------------------------------------|
| PBMCs, 11 cell lineages          | Fig.1          | Naïve T lymphocytes | CD3e, CD4, CD8a, TCF7, SELL, LEF1, CCR7         |
|                                  | Fig.1          | CD4+ T Helper       | CD3e, CD4, GATA3, IL4, IFNG, CXCR3, CCR3, RORC2 |
|                                  | Fig.1          | CD8+ CTL            | CD3e, CD8a, GZMA, GZMB, PRF1, CTLA4, IFNG, NKG7 |
|                                  | Fig.1          | Treg                | CD4, Foxp3, IL2RA                               |
|                                  | Fig.1          | NK cells            | Klrd1, NKG7, Xcl1, Klrb1b, PRF1, GZMA, NCR1     |
|                                  | Fig.1          | NKT cells           | CD4,CD8, NKG7,Xcl1, Klrb1b, PRF1, GZMA, NCR1    |
|                                  | Fig.1          | CD14+ Mono          | CD14, LYZ1,CD86, CD80, F4/80, Mafb, Chil3,      |
|                                  | Fig.1          | DCs                 | CD14, CD80, CD86, CD11c, F4/80                  |
|                                  | Fig.1          | Neutrophil          | CD14, CXCL2, CXCR2, Mmp9, Selp, S100a8, S100a9  |
|                                  | Fig.1          | pDCs                | PDCA-1, Siglec-H, IRF7, Ly6C, Ly6k              |
|                                  | Fig.1          | B lymphocytes       | CD19, CD79A,                                    |
| Stomach CD45+, 15 cell lineages  | Fig.2          | Naïve CD8+ T        | CD3, CD8a, Nrcam                                |
|                                  | Fig.2          | Exhausted CD8+ T    | CD3, CD8a, LAG3, TIGIT, HAVCR2                  |
|                                  | Fig.2          | CD8+ CTL            | CD3, CD8a, GZMA, GZMB, PRF1, CTLA4, IFNG, NKG7  |
|                                  | Fig.2          | CD4+ Th             | CD4, GATA3, IL4, IFNG, CXCR3, CCR3, RORC2       |
|                                  | Fig.2          | Naïve CD4+T         | CD4, TCF7, SELL, LEF1, CCR7                     |
|                                  | Fig.2          | $\gamma\delta$ T    | CD226, Efna5, TCRGC2, TCRGC1                    |
|                                  | Fig.2          | NKT cells           | CD3e, Klrd1, NKG7, Xcl1, Klrb1b,                |
|                                  | Fig.2          | NK cells            | Klrd1, NKG7, Xcl1, Klrb1b, NCR1                 |
|                                  | Fig.2          | MALT B cells        | CD19, CD79A, Jchain, IGHA                       |
|                                  | Fig.2          | Myeloid cells       | CD14, CD33, Itgam, Csf3r, Csf1r,                |
|                                  | Fig.2          | MDSCs               | CD14, CD33, Itgam, NOS2, Arg1, TNF, IL1a        |
|                                  | Fig.2          | MAST cells          | KIT, Gata2, Cpa3                                |
|                                  | Fig.2          | pDCs                | PDCA-1, Siglec-H, IRF7, Ly6C, Ly6k              |
|                                  | Fig.2          | CD19+ pDC-like cell | PDCA-1, CD19, IRF7, Ly6C, Ly6k                  |
| Fig.2                            | B lymphocytes  | CD19, CD79A,        |                                                 |
| Subset of PBMC Slfn4+ Neutrophil | Fig.1          | N1                  | Npg, Camp, Lft, Chil3                           |
|                                  | Fig.1          | N2                  | Ifit3, Gbp2, Gbp5, Gvin1, PD-L1                 |
|                                  | Fig.1          | N3                  | Ubox5, Map2k6, Cpeb4, ACSL1                     |
| Subset of stomach Slfn4+ cells   | Fig. 2         | STS4-1              | Lrrc14b, Pnp2, Fam120c, Mafb, Arg1              |
|                                  | Fig. 2         | STS4-2              | Tnf, NOS2, Il1a, Il27, CXCL1, CXCL2             |
|                                  | Fig. 2         | STS4-3              | S100a8, S100a9, Trem1, Npg, Lft, Camp           |
